# Supplementary material
Source: MDPI journal article supplement (https://www.mdpi.com/2071-1050/11/4/1033)
Supplement: s1 [file s1]

**Table S1 PRISMA Framework Checklist**

|                             |                                                                                                                                                                                                                                                                                                                                                                                                                                                                                                                                                                                                                                                                                                                                                                                                                                                                                                                                                                                                                                                                                                                                                                                                                                                                                                                                                                                                                                                                                                                                                                                                                                                                                                                                                                                                                                |
|-----------------------------|--------------------------------------------------------------------------------------------------------------------------------------------------------------------------------------------------------------------------------------------------------------------------------------------------------------------------------------------------------------------------------------------------------------------------------------------------------------------------------------------------------------------------------------------------------------------------------------------------------------------------------------------------------------------------------------------------------------------------------------------------------------------------------------------------------------------------------------------------------------------------------------------------------------------------------------------------------------------------------------------------------------------------------------------------------------------------------------------------------------------------------------------------------------------------------------------------------------------------------------------------------------------------------------------------------------------------------------------------------------------------------------------------------------------------------------------------------------------------------------------------------------------------------------------------------------------------------------------------------------------------------------------------------------------------------------------------------------------------------------------------------------------------------------------------------------------------------|
| <p><b>1. Title</b></p>      | <p>Telecoupling Research: The First Five Years</p>                                                                                                                                                                                                                                                                                                                                                                                                                                                                                                                                                                                                                                                                                                                                                                                                                                                                                                                                                                                                                                                                                                                                                                                                                                                                                                                                                                                                                                                                                                                                                                                                                                                                                                                                                                             |
| <p><b>2. Abstract</b></p>   | <p>In an increasingly interconnected world, human-environment interactions involving flows of people, organisms, goods, information, and energy are expanding in magnitude and extent, often over long distances. As a universal paradigm for examining these interactions, the telecoupling framework (published in 2013) has been broadly implemented across the world by researchers from diverse disciplines. We conducted a systematic review of the first five years of telecoupling research to evaluate the state of telecoupling science and identify strengths, areas to be improved, and promising avenues for future study. We identified 89 studies using any derivation of the term telecoupling. These works emphasize trade flows, information transfer, and species dispersal at international, national, and regional scales involving one or a few countries, with China, Brazil, and the United States being the most frequently studied countries. Our review showed a rising trend in publications and citations on telecoupling, with 63% of identified telecoupling studies using the framework’s specific language (e.g., “flows”, “agents”, etc.). This result suggests that future telecoupling studies could apply the standardized telecoupling language and terminology to better coordinate, synthesize, and operationalize interdisciplinary research. Compelling topics for future research include operationalization of the telecoupling framework, commonalities among telecouplings, telecoupling mechanisms and causality, and telecoupled systems governance. Overall, the first five years of telecoupling research have improved our understanding of human-environment interactions, laying a promising foundation for future social-ecological research in a telecoupled world.</p> |
| <p><b>3. Rationale</b></p>  | <p>In the first five years of its existence, the telecoupling framework has been implemented across the world, in both terrestrial and aquatic environments, and from the lens of a wide array of disciplinary and interdisciplinary approaches. Up to this point, no synthesis work has been conducted to systematically aggregate, summarize, and synthesize the findings of telecoupling research. The results of this analysis paint a clear picture of the field of telecoupling research over the past five years and help to identify research areas in which telecoupling has a strong presence as well as those in which there is substantial potential for expansion.</p>                                                                                                                                                                                                                                                                                                                                                                                                                                                                                                                                                                                                                                                                                                                                                                                                                                                                                                                                                                                                                                                                                                                                            |
| <p><b>4. Objectives</b></p> | <p>The main objective is to review the first five years of telecoupling research, synthesize research findings, and identify promising avenues for new research.</p>                                                                                                                                                                                                                                                                                                                                                                                                                                                                                                                                                                                                                                                                                                                                                                                                                                                                                                                                                                                                                                                                                                                                                                                                                                                                                                                                                                                                                                                                                                                                                                                                                                                           |

|                                                |                                                                                                                                                                                                                                                                                                                                                                                                                                                                                                                                                                                                                                                                                                                                                                                                                                                                   |
|------------------------------------------------|-------------------------------------------------------------------------------------------------------------------------------------------------------------------------------------------------------------------------------------------------------------------------------------------------------------------------------------------------------------------------------------------------------------------------------------------------------------------------------------------------------------------------------------------------------------------------------------------------------------------------------------------------------------------------------------------------------------------------------------------------------------------------------------------------------------------------------------------------------------------|
| <b>5. Protocol for review and registration</b> | Codebook (Table S2)                                                                                                                                                                                                                                                                                                                                                                                                                                                                                                                                                                                                                                                                                                                                                                                                                                               |
| <b>6. Eligibility</b>                          | Publications were eligible for inclusion if they were (a) published in English, (b) published after 1 January 2013, (c) published in peer-reviewed journals, book chapters, or reports.                                                                                                                                                                                                                                                                                                                                                                                                                                                                                                                                                                                                                                                                           |
| <b>7. Information sources</b>                  | Papers for review have been collected from Web of Knowledge as well as from peer-reviewed journals and book chapters identified by the co-authors; no additional information was acquired.                                                                                                                                                                                                                                                                                                                                                                                                                                                                                                                                                                                                                                                                        |
| <b>8. Search</b>                               | Publications were derived from a topic search on the Web of Knowledge on 1 July 2018 (Topic = telecoup* OR tele-coup*; Timespan of publication = 2013-2018; Search language = English). As Web of Knowledge includes all major journals in which known telecoupling papers have been published, no other databases were included. Additional papers missing from the Web of Science search were identified and added to the analysis by co-authors. Each selected publication was systematically coded according to the criteria listed in section 11. The English language criterion was included because international journals typically publish in English. Additionally, our limited knowledge of other languages would have created a strong bias towards the few languages outside English in which we had sufficient proficiency to read academic papers. |
| <b>9. Study selection</b>                      | Publications identified from the Web of Knowledge search were further screened from their title, abstract, and keywords. Potential publications were selected for inclusion in the analysis if they include any derivative of the word “telecoupling” in their title, keywords, or abstract.                                                                                                                                                                                                                                                                                                                                                                                                                                                                                                                                                                      |
| <b>10. Data collection</b>                     | Selected cases were screened by the primary authors to ensure they fit the criteria for selection (namely that they contain at least one of the words “telecoupling”, “telecoupled”, “tele-coupling” or “tele-coupled” in their title, abstract, or keywords). Once selected papers are identified, they were independently reviewed and coded by co-authors with expertise in the subject area.                                                                                                                                                                                                                                                                                                                                                                                                                                                                  |
| <b>11. Data items</b>                          | Each selected publication was analyzed to determine the scale(s) of analyses (e.g., local, national), region(s) studied (e.g., South America), countries studied, number of countries studied, telecoupling flow type (migration, investment, agricultural trade, etc.), number of times cited, and future directions for telecoupling research identified. Definitions and criteria for each of these categories were incorporated into a codebook created by the primary authors (K.K. and C.H.) that was made available for all co-authors during review (see table S2). The primary authors each coded two studies independently before distributing to ensure that coding criteria were standardized. Papers were then be coded by co-authors.                                                                                                               |

|                                          |                                                                                                                                                                                                                                                                                                                                                                                                                                                                                                                                                                                                                                                                                                                                              |
|------------------------------------------|----------------------------------------------------------------------------------------------------------------------------------------------------------------------------------------------------------------------------------------------------------------------------------------------------------------------------------------------------------------------------------------------------------------------------------------------------------------------------------------------------------------------------------------------------------------------------------------------------------------------------------------------------------------------------------------------------------------------------------------------|
|                                          | Results from the coding of papers selected for review were collated and reviewed by the primary authors.                                                                                                                                                                                                                                                                                                                                                                                                                                                                                                                                                                                                                                     |
| <b>12. Risk of bias of individual</b>    | We assumed that all studies applying the telecoupling concept or framework would use “telecoupling” in their titles, keywords, or abstracts. However, some telecoupling-related studies may have been excluded from the analysis if they used the telecoupling framework, but did not feature it in their titles, keywords, or abstracts. We also assumed that when the authors of the reviewed publications used the terminology of the telecoupling framework (e.g., by labelling components), that they were using the framework to structure their analyses. In other words, we assumed that any component labelled (e.g., “sending system”) was attributed to part of the telecoupling framework rather than a grammatical coincidence. |
| <b>13. Summary measures</b>              | Coded analyses from reviewed studies were summarized by their absolute and their relative frequency. Within each category, all cases had an equal weight in this review.                                                                                                                                                                                                                                                                                                                                                                                                                                                                                                                                                                     |
| <b>14. Synthesis of results</b>          | We identified important trends and gaps in telecoupling research based on the results of this analysis.                                                                                                                                                                                                                                                                                                                                                                                                                                                                                                                                                                                                                                      |
| <b>15. Risk of bias across studies</b>   | We ran the risk of biasing the geographic scope of analyses by only analyzing paper published in English. It may be the case that papers fitting our coding criteria have been published in other languages.                                                                                                                                                                                                                                                                                                                                                                                                                                                                                                                                 |
| <b>16. Additional analysis</b>           | No additional analyses were performed.                                                                                                                                                                                                                                                                                                                                                                                                                                                                                                                                                                                                                                                                                                       |
| <b>17. Study selection</b>               | The systematic search in Web of Science returned 74 publications fitting the criteria for inclusion in the study. Fifteen additional publications were identified by co-authors for inclusion in the study, resulting in a sample size of 89 publications.                                                                                                                                                                                                                                                                                                                                                                                                                                                                                   |
| <b>18. Study characteristics</b>         | N/A                                                                                                                                                                                                                                                                                                                                                                                                                                                                                                                                                                                                                                                                                                                                          |
| <b>19. Risk of bias within studies</b>   | Authors of the reviewed publications may have incorrectly or inconsistently utilized the telecoupling framework. Additionally, they may not have published a complete report of the telecoupling process being studied.                                                                                                                                                                                                                                                                                                                                                                                                                                                                                                                      |
| <b>20. Results of individual studies</b> | See Table S3.                                                                                                                                                                                                                                                                                                                                                                                                                                                                                                                                                                                                                                                                                                                                |
| <b>21. Synthesis of results</b>          | Telecoupling studies have been published in 47 different publications between 2013 and July of 2018. Countries from six continents have been examined through the lens of telecoupling. The most commonly analyzed flow type was trade, followed by knowledge transfer.                                                                                                                                                                                                                                                                                                                                                                                                                                                                      |
| <b>22. Risk of bias across studies</b>   | Despite the use of a codebook, individual reviewers of the reviewed publications may have coded the publications differently (e.g., by applying their own knowledge of telecoupling to interpret the intentions                                                                                                                                                                                                                                                                                                                                                                                                                                                                                                                              |

|                                |                                                                                                                                                                                                                                                                                                                                                                                                                                                                                                                                                                                                                                                                                                                                                                                                                                                                                                                                                                                                                                                                                                                                                                                                                                                                                                                                                   |
|--------------------------------|---------------------------------------------------------------------------------------------------------------------------------------------------------------------------------------------------------------------------------------------------------------------------------------------------------------------------------------------------------------------------------------------------------------------------------------------------------------------------------------------------------------------------------------------------------------------------------------------------------------------------------------------------------------------------------------------------------------------------------------------------------------------------------------------------------------------------------------------------------------------------------------------------------------------------------------------------------------------------------------------------------------------------------------------------------------------------------------------------------------------------------------------------------------------------------------------------------------------------------------------------------------------------------------------------------------------------------------------------|
|                                | of the publication authors rather than directly analyzing the authors' words).                                                                                                                                                                                                                                                                                                                                                                                                                                                                                                                                                                                                                                                                                                                                                                                                                                                                                                                                                                                                                                                                                                                                                                                                                                                                    |
| <b>23. Additional analysis</b> | N/A                                                                                                                                                                                                                                                                                                                                                                                                                                                                                                                                                                                                                                                                                                                                                                                                                                                                                                                                                                                                                                                                                                                                                                                                                                                                                                                                               |
| <b>24. Summary of evidence</b> | <p>Three different applications of “telecoupling” were revealed through the literature review. “Phenomenon” papers were those that mentioned the word telecoupling, but outside of the context of the research that was being conducted (e.g., telecoupling was a keyword or appeared in the abstract but was not mentioned any other time). “Concept” papers used the word telecoupling at least once in the context of the research being conducted. “Framework” papers applied the telecoupling framework by labelling at least one component of the study system(s) according to the telecoupling framework (e.g., identified sending and receiving systems). Four primary themes in the telecoupling emerged from the literature review: novel hypothesis generation, the identification of knowledge gaps, the identification of spillover systems, and the assessment of feedbacks, trade-offs, and synergies of telecoupled systems. However, the framework still has many areas for improvement, including operationalization of the framework, analysis of spillover systems, cross-disciplinary analyses, identifying the processual commonalities behind telecoupling processes, identifying the mechanisms by which telecouplings occur, and identifying the role of governance and institutional change in telecoupled systems.</p> |
| <b>25. Limitations</b>         | <p>Because the field of telecoupling research is new and has been applied to many disciplines, it can be difficult to make broad generalizations about the patterns discovered by the literature review. Additionally, the wide degree to which telecoupling has been used in the literature also contributed to the difficulty of generalizations (e.g., just being mentioned once in the abstract or an entire paper dedicated to analyzing the ways in which a particular situation can be classified under the telecoupling framework).</p>                                                                                                                                                                                                                                                                                                                                                                                                                                                                                                                                                                                                                                                                                                                                                                                                   |
| <b>26. Conclusion</b>          | <p>Many of the important contributions of the telecoupling framework are attributable to its novel, systematic, and socio-ecologically integrative structure. As a paradigm that explicitly synthesizes socioeconomic and environmental information over distances, the telecoupling framework advances monothematic research approaches (e.g., those that only consider human or environmental perspectives at a single place) by providing social-ecological context for distant interactions and the systems, flows, agents, causes, and effects involved. In so doing, the telecoupling framework facilitates a broader, deeper understanding of complexity than was formerly possible. The telecoupling framework is</p>                                                                                                                                                                                                                                                                                                                                                                                                                                                                                                                                                                                                                     |

|                           |                                                                                                                                                                                                                                                                                                                                                                                                                                                                                                                                                                                                                                                                                                                                                                                                                                                                                                                                                                                                                                                                                                                                                                                                                                                                                                                                                                                                                                                                                       |
|---------------------------|---------------------------------------------------------------------------------------------------------------------------------------------------------------------------------------------------------------------------------------------------------------------------------------------------------------------------------------------------------------------------------------------------------------------------------------------------------------------------------------------------------------------------------------------------------------------------------------------------------------------------------------------------------------------------------------------------------------------------------------------------------------------------------------------------------------------------------------------------------------------------------------------------------------------------------------------------------------------------------------------------------------------------------------------------------------------------------------------------------------------------------------------------------------------------------------------------------------------------------------------------------------------------------------------------------------------------------------------------------------------------------------------------------------------------------------------------------------------------------------|
|                           | <p>highly flexible (i.e., useful in diverse fields) and applicable (e.g., conducive for translating science into policy and management strategies). Ultimately, these characteristics of the telecoupling framework allow researchers and managers, among others, to advance the science and practice of sustainability in ways that utilize information on both local and distant socioeconomic and environmental interactions. This unique ability separates the telecoupling framework from many other research approaches and helps explain its growing importance across diverse disciplines. The past five years have resulted in a solid foundation of telecoupling research with a future even more promising as new avenues for investigation and application arise.</p>                                                                                                                                                                                                                                                                                                                                                                                                                                                                                                                                                                                                                                                                                                     |
| <p><b>27. Funding</b></p> | <p>J.G.Z. was supported by the Swiss Programme for Research on Global Issues for Development (r4d programme), which is funded by the Swiss National Science Foundation (SNSF) and the Swiss Agency for Development and Cooperation (SDC), under grant number 400440 152167. A.K.C. was supported by the University Distinguished Fellowship and Robert C. Ball and Betty A. Ball Fisheries and Wildlife Fellowship [Michigan State University], the NASA-MSU Professional Enhancement Award, and the United States Department of Agriculture National Institute of Food and Agriculture [grant number MICL04161]. Y.L. was supported by the Environmental Science and Policy Program Fellowship. C. H. and Y. Dou were supported by the National Science Foundation Complex Dynamics of Telecoupled Human and Natural Systems, grant number 1518518. E.K.B. was supported by the NASA-MSU Professional Enhancement Award. K.E.K. was supported by the William W. and Evelyn M. Taylor Endowed Fellowship for International Engagement in Coupled Humans and Natural Systems. R.F.B.S. was supported by grants from Fundação de Amparo à Pesquisa do Estado de São Paulo (grant numbers 15/25892-7 and 14/50628-9). Y.Du. was supported by the NASA-MSU Professional Enhancement Award and China Scholarship Council. D. Y. was supported by NASA-MSU Professional Enhancement Award. J.L. was supported by the U.S. National Science Foundation, NASA, and Michigan AgBioResearch</p> |

Moher D, Liberati A, Tetzlaff J, Altman DG (2009) Preferred reporting items for systematic reviews and meta-analyses: the PRISMA statement. *Ann Intern Med* 151:264. doi: 10.7326/0003-4819-151-4-200908180-00135

**Table S2 Codebook**

| Category | Description |
|----------|-------------|
|----------|-------------|

|                                                    |                                                                                                                                                                                                                                                                                                                                                                                  |
|----------------------------------------------------|----------------------------------------------------------------------------------------------------------------------------------------------------------------------------------------------------------------------------------------------------------------------------------------------------------------------------------------------------------------------------------|
| <b>GEOGRAPHIC SCALE(S) OF ANALYSES</b>             | Geographic scale at which data were analyzed (local, regional, national, international). For instance, a study examining trade between the United States and China would be an international-scale study whereas a similar study investigating trade within China would be national-scale. Multiple scales of analysis are denoted using commas (i.e. National, Regional)        |
| <b>COUNTRIES STUDIED</b>                           | Countries that were included in the analysis beyond simply being mentioned in Introduction or Discussion. If there are less than 5 focal countries, list by name. Otherwise, list as "multiple".                                                                                                                                                                                 |
| <b>NUMBER OF COUNTRIES STUDIED</b>                 | List the number of countries from which data were collected/analyzed.                                                                                                                                                                                                                                                                                                            |
| <b>REGION(S) STUDIED</b>                           | Specific geographic locations that were evaluated (e.g., Heilongjiang Province, Matto Grosso). If the researchers use a specific province or region to represent a national-scale event, please cite the region or province that was analyzed, not the country. If an analysis was only conducted at the international scale (e.g., using international trade data), write "na". |
| <b>TELECOUPLING FLOW TYPE</b>                      | Category of flow(s) analyzed (e.g., migration, tourism, trade, technology transfer, investment, knowledge transfer, species dispersal, water transfer, waste transfer)                                                                                                                                                                                                           |
| <b>NUMBER OF TIMES CITED (GOOGLE SCHOLAR)</b>      | Citation number derived from Google Scholar search                                                                                                                                                                                                                                                                                                                               |
| <b>NUMBER OF TIMES CITED (WEB OF SCIENCE)</b>      | Citation number derived from Web of Science Search                                                                                                                                                                                                                                                                                                                               |
| <b>FUTURE DIRECTIONS FOR TELECOUPLING RESEARCH</b> | Future directions for research and/or gaps in data/knowledge identified by the authors at the completion of their study (i.e. not the motivation for their study) as they relate to telecoupling research or the telecoupling framework.                                                                                                                                         |
| <b>TYPE OF TELECOUPLING STUDY</b>                  | The studies in this review were classified as either “Phenomena”, “Concept”, or “Framework” based on their use of telecoupling. See below for details.                                                                                                                                                                                                                           |
| <i>PHENOMENA</i>                                   | The word “telecoupling” (or any derivative of it; e.g., “telecoupled”) is used in any portion of the paper, but no other citations to telecoupling papers or further mentions of the word are included. For example, telecoupling is included in the keywords, but mentioned nowhere else and the content of the paper appears unrelated to telecoupling.                        |
| <i>CONCEPT</i>                                     | The word “telecoupling” is used in the specific context of the research. Study topics are characterized as a telecoupled process, with some boundaries defined. However, the specific terminology of the telecoupling framework is not used.                                                                                                                                     |
| <i>FRAMEWORK APPLICATION</i>                       | At least one component of the telecoupling framework is explicitly labeled AND telecoupling is mentioned. For example: “The agent in this system is a farmer.” It may be helpful to explicitly search for the components (i.e. agent, flow, sending system, receiving system, spillover system, causes, effects).                                                                |
| <b>NOTES</b>                                       | Explanations for any comments, uncertainties, or concerns                                                                                                                                                                                                                                                                                                                        |

**Table S3. Reviewed Telecoupling Literature**

| #  | Title                                                                                                                                                      | Authors                                                                                                                                                              | Publication Name                                                                | Year | Volume | Issue | Telecoupling Use Type |
|----|------------------------------------------------------------------------------------------------------------------------------------------------------------|----------------------------------------------------------------------------------------------------------------------------------------------------------------------|---------------------------------------------------------------------------------|------|--------|-------|-----------------------|
| 1  | Distal impacts of aquarium trade: Exploring the emerging sandhopper ( <i>Orchestoidea tuberculata</i> ) artisanal shore gathering fishery in Chile         | Tapia-Lewin, Sebastian; Vergara, Karina; De La Barra, Christian; Godoy, Natalio; Carlos Castilla, Juan; Gelcich, Stefan                                              | Ambio                                                                           | 2017 | 46     | 6     | Phenomena             |
| 2  | Adaptation of global land use and management intensity to changes in climate and atmospheric carbon dioxide.                                               | Alexander, Peter; Rabin, Sam; Anthoni, Peter; Henry, Roslyn; Pugh, Thomas A M; Rounsevell, Mark D A; Arneth, Almut                                                   | Global Change Biology                                                           | 2018 | NA     | NA    | Phenomena             |
| 3  | A proposal for the theoretical analysis of the interactive coupled effects between urbanization and the eco-environment in mega-urban agglomerations       | Fang Chuanglin; Zhou Chenghu; Gu Chaolin; Chen Liding; Li Shuangcheng                                                                                                | Journal Of Geographical Sciences                                                | 2017 | 27     | 12    | Phenomena             |
| 4  | Evolving human landscapes: a virtual laboratory approach                                                                                                   | Magliocca, Nicholas R.; Ellis, Erle C.                                                                                                                               | Journal Of Land Use Science                                                     | 2016 | 11     | 6     | Phenomena             |
| 5  | Redefining community based on place attachment in a connected world                                                                                        | Gurney, Georgina G.; Blythe, Jessica; Adams, Helen; Adger, W. Neil; Curnock, Matthew; Faulkner, Lucy; James, Thomas; Marshall, Nadine A.                             | Proceedings Of The National Academy Of Sciences Of The United States Of America | 2017 | 114    | 38    | Phenomena             |
| 6  | Have there been forest transitions? Forest transition theory revisited in the context of the Modifiable Areal Unit Problem                                 | Kozak, Jacek; Szwagrzyk, Marcin                                                                                                                                      | Area                                                                            | 2016 | 48     | 4     | Phenomena             |
| 7  | Evolving the Anthropocene: linking multi-level selection with long-term social-ecological change                                                           | Ellis, Erle C.; Magliocca, Nicholas R.; Stevens, Chris J.; Fuller, Dorian Q.                                                                                         | Sustainability Science                                                          | 2018 | 13     | 1     | Phenomena             |
| 8  | Spatiotemporal Data Mining: A Computational Perspective                                                                                                    | Shekhar, Shashi; Jiang, Zhe; Ali, Reem Y.; Eftelioglu, Emre; Tang, Xun; Gunturi, Venkata M. V.; Zhou, Xun                                                            | Isprs International Journal Of Geo-Information                                  | 2015 | 4      | 4     | Phenomena             |
| 9  | Conceptualizing Distal Drivers in Land Use Competition                                                                                                     | Niewoehner, Joerg; Nielsen, Jonas O.; Gasparri, Ignacio; Gou, Yaqing; Hauge, Mads; Joshi, Neha; Schaffartzik, Anke; Sejersen, Frank; Seto, Karen C.; Shughrue, Chris | Land Use Competition: Ecological, Economic And Social Perspectives              | 2016 | 6      | NA    | Phenomena             |
| 10 | Identification and apportionment of the drivers of land use change on a regional scale: Unbiased recursive partitioning-based stochastic model application | Wang, Qi; Ren, Qingfu; Liu, Jianfeng                                                                                                                                 | Agriculture Ecosystems & Environment                                            | 2016 | 217    | NA    | Phenomena             |

|    |                                                                                                                                                 |                                                                                                                                                                                                                   |                                                                       |      |     |    |           |
|----|-------------------------------------------------------------------------------------------------------------------------------------------------|-------------------------------------------------------------------------------------------------------------------------------------------------------------------------------------------------------------------|-----------------------------------------------------------------------|------|-----|----|-----------|
| 11 | Changes in Land-Use Governance in an Urban Era                                                                                                  | Gentry, Bradford S.; Sikor, Thomas; Auld, Graeme; Bebbington, Anthony J.; Benjaminsen, Tor A.; Hunsberger, Carol A.; Izac, Anne-Marie; Margulis, Matias E.; Plieninger, Tobias; Schroeder, Heike; Upton, Caroline | Rethinking Global Land Use In An Urban Era                            | 2014 | NA  | NA | Phenomena |
| 12 | The impacts of warfare and armed conflict on land systems                                                                                       | Baumann, Matthias; Kuemmerle, Tobias                                                                                                                                                                              | Journal Of Land Use Science                                           | 2016 | 11  | 6  | Concept   |
| 13 | Complex problems and unchallenged solutions: Bringing ecosystem governance to the forefront of the UN sustainable development goals             | Vasseur, Liette; Horning, Darwin; Thornbush, Mary; Cohen-Shacham, Emmanuelle; Andrade, Angela; Barrow, Ed; Edwards, Steve R.; Wit, Piet; Jones, Mike                                                              | Ambio                                                                 | 2017 | 46  | 7  | Concept   |
| 14 | International progress and evaluation on interactive coupling effects between urbanization and the eco-environment                              | Fang Chuanglin; Liu Haimeng; Li Guangdong                                                                                                                                                                         | Journal of Geographical Sciences                                      | 2016 | 26  | 8  | Concept   |
| 15 | One Bioregion/One Health: An Integrative Narrative for Transboundary Planning along the US-Mexico Border.                                       | Pezzoli, Keith; Kozo, Justine; Ferran, Karen; Wooten, Wilma; Gomez, Gudelia Rangel; Al-Delaimy, Wael K                                                                                                            | Global Society : Journal Of Interdisciplinary International Relations | 2014 | 28  | 4  | Concept   |
| 16 | Biodiversity and ecosystem services require IPBES to take novel approach to scenarios                                                           | Kok, Marcel T. J.; Kok, Kasper; Peterson, Garry D.; Hill, Rosemary; Agard, John; Carpenter, Stephen R.                                                                                                            | Sustainability Science                                                | 2017 | 12  | 1  | Concept   |
| 17 | Conservation planning beyond giant pandas: the need for an innovative telecoupling framework                                                    | Wang, Fang; Liu, Jianguo                                                                                                                                                                                          | Science China-Life Sciences                                           | 2017 | 60  | 5  | Concept   |
| 18 | Snowlines and Treelines in the Tropical Andes                                                                                                   | Young, Kenneth R.; Ponette-Gonzalez, Alexandra G.; Polk, Molly H.; Lipton, Jennifer K.                                                                                                                            | Annals Of The American Association Of Geographers                     | 2017 | 107 | 2  | Concept   |
| 19 | A novel participatory and remote-sensing-based approach to mapping annual land use change on forest frontiers in Laos, Myanmar, and Madagascar. | Zaehringer, J. G., Llopis, J. C., Latthachack, P., Thein, T. T., & Heinimann, A.                                                                                                                                  | Journal Of Land Use Science                                           | 2018 | NA  | NA | Concept   |
| 20 | The dynamics of beef trade between Brazil and Russia and their environmental implications                                                       | Schierhorn, Florian; Meyfroidt, Patrick; Kastner, Thomas; Kuemmerle, Tobias; Prishchepov, Alexander V.; Mueller, Daniel                                                                                           | Global Food Security-Agriculture Policy Economics And Environment     | 2016 | 11  | NA | Concept   |
| 21 | Nuts About Gold: Competition for Land in Madre de Dios, Peru                                                                                    | Joshi, Neha                                                                                                                                                                                                       | Land Use Competition: Ecological, Economic And Social Perspectives    | 2016 | 6   | NA | Concept   |
| 22 | Using social-ecological syndromes to understand impacts of international seafood trade on small-scale fisheries                                 | Crona, B. I.; Van Holt, T.; Petersson, M.; Daw, T. M.; Buchary, E.                                                                                                                                                | Global Environmental Change-Human And Policy Dimensions               | 2015 | 35  | NA | Concept   |
| 23 | Synthesis of human-nature feedbacks                                                                                                             | Hull, Vanessa; Tuanniu, Mao-Ning; Liu, Jianguo                                                                                                                                                                    | Ecology And Society                                                   | 2015 | 20  | 3  | Concept   |



|    |                                                                                                                                                          |                                                                                                                                                                                                     |                                                                          |      |    |    |         |
|----|----------------------------------------------------------------------------------------------------------------------------------------------------------|-----------------------------------------------------------------------------------------------------------------------------------------------------------------------------------------------------|--------------------------------------------------------------------------|------|----|----|---------|
| 24 | Lessons from Local Studies for Global Sustainability                                                                                                     | Liu, Jianguo; Hull, Vanessa; Yang, Wu; Vina, Andres; An, Li; Carter, Neil; Chen, Xiaodong; Liu, Wei; Ouyang, Zhiyun; Zhang, Hemin                                                                   | Pandas And People: Coupling Human And Natural Systems For Sustainability | 2016 | NA | NA | Concept |
| 25 | Ecosystem Services from Transborder Migratory Species: Implications for Conservation Governance                                                          | Lopez-Hoffman, Laura; Chester, Charles C.; Semmens, Darius J.; Thogmartin, Wayne E.; Rodriguez-McGoffin, M. Sofia; Merideth, Robert; Diffendorfer, Jay E.                                           | Annual Review Of Environment And Resources                               | 2017 | 42 | NA | Concept |
| 26 | Trading Land: A Review of Approaches to Accounting for Upstream Land Requirements of Traded Products                                                     | Schaffartzik, Anke; Haberl, Helmut; Kastner, Thomas; Wiedenhofer, Dominik; Eisenmenger, Nina; Erb, Karl-Heinz                                                                                       | Journal Of Industrial Ecology                                            | 2015 | 19 | 5  | Concept |
| 27 | Significance of Telecoupling for Exploration of Land-Use Change                                                                                          | Eakin, Hallie; DeFries, Ruth; Kerr, Suzi; Lambin, Eric F.; Liu, Jianguo; Marcotullio, Peter J.; Messerli, Peter; Reenberg, Anette; Rueda, Ximena; Swaffield, Simon R.; Wicke, Birka; Zimmerer, Karl | Rethinking Global Land Use In An Urban Era                               | 2014 | NA | NA | Concept |
| 28 | Globalization's limits to the environmental state? Integrating telecoupling into global environmental governance                                         | Lenschow, Andrea; Newig, Jens; Challies, Edward                                                                                                                                                     | Environmental Politics                                                   | 2016 | 25 | 1  | Concept |
| 29 | From teleconnection to telecoupling: taking stock of an emerging framework in land system science                                                        | Friis, Cecilie; Nielsen, Jonas Ostergaard; Otero, Iago; Haberl, Helmut; Niewoehner, Joerg; Hostert, Patrick                                                                                         | Journal Of Land Use Science                                              | 2016 | 11 | 2  | Concept |
| 30 | Global Human Appropriation of Net Primary Production for Biomass Consumption in the European Union, 1986-2007                                            | Kastner, Thomas; Erb, Karl-Heinz; Haberl, Helmut                                                                                                                                                    | Journal Of Industrial Ecology                                            | 2015 | 19 | 5  | Concept |
| 31 | Integrating Modelling Approaches for Understanding Telecoupling: Global Food Trade and Local Land Use                                                    | Millington, James D. A.; Xiong, Hang; Peterson, Steve; Woods, Jeremy                                                                                                                                | Land                                                                     | 2017 | 6  | 3  | Concept |
| 32 | Drivers of Human Stress on the Environment in the Twenty-First Century                                                                                   | Dietz, Thomas                                                                                                                                                                                       | Annual Review Of Environment And Resources                               | 2017 | 42 | NA | Concept |
| 33 | When ecosystems and their services are not co-located: oceans and coasts                                                                                 | Drakou, Evangelia G.; Pendleton, Linwood; Effron, Micah; Ingram, Jane Carter; Teneva, Lida                                                                                                          | Ices Journal Of Marine Science                                           | 2017 | 74 | 6  | Concept |
| 34 | Telecoupling between catch, farming, and international trade for the gastropods <i>Concholepas concholepas</i> (loco) and <i>Haliotis spp.</i> (abalone) | Carlos Castilla, Juan; Espinosa, Javiera; Yamashiro, Carmen; Melo, Oscar; Gelcich, Stefan                                                                                                           | Journal Of Shellfish Research                                            | 2016 | 35 | 2  | Concept |
| 35 | Drought impacts to water footprints and virtual water transfers of the Central Valley of California                                                      | Marston, Landon; Konar, Megan                                                                                                                                                                       | Water Resources Research                                                 | 2017 | 53 | 7  | Concept |

|    |                                                                                                                                                                                                               |                                                                                                                             |                                                 |      |     |    |           |
|----|---------------------------------------------------------------------------------------------------------------------------------------------------------------------------------------------------------------|-----------------------------------------------------------------------------------------------------------------------------|-------------------------------------------------|------|-----|----|-----------|
| 36 | The Sino-Brazilian Telecoupled Soybean System and Cascading Effects for the Exporting Country                                                                                                                 | Bicudo da Silva, Ramon Felipe; Batistella, Mateus; Dou, Yue; Moran, Emilio; Torres, Sara McMillan; Liu, Jianguo             | Land                                            | 2017 | 6   | 3  | Framework |
| 37 | On the System. Boundary Choices, Implications, and Solutions in Telecoupling Land Use Change Research                                                                                                         | Friis, Cecilie; Nielsen, Jonas Ostergaard                                                                                   | Sustainability                                  | 2017 | 9   | 6  | Framework |
| 38 | Transatlantic wood pellet trade demonstrates telecoupled benefits                                                                                                                                             | Parish, Esther S; Herzberger, Anna J; Phifer, Colin C; Dale, Virginia H                                                     | Ecology And Society                             | 2018 | 23  | 1  | Framework |
| 39 | Even at the uttermost ends of the Earth: how seabirds telecouple the Beagle Channel with regional and global processes that affect environmental conservation and social-ecological sustainability            | Raya Rey, Andrea N.; Cristobal Pizarro, J.; Anderson, Christopher B.; Huettmann, Falk                                       | Ecology And Society                             | 2017 | 22  | 4  | Framework |
| 40 | Property Rights and the Soybean Revolution: Shaping How China and Brazil Are Telecoupled                                                                                                                      | Torres, Sara M.; Moran, Emilio F.; Bicudo da Silva, Ramon Felipe                                                            | Sustainability                                  | 2017 | 9   | 6  | Framework |
| 41 | A conceptual framework for analyzing deltas as coupled social-ecological systems: an example from the Amazon River Delta                                                                                      | Brondizio, Eduardo S.; Vogt, Nathan D.; Mansur, Andressa V.; Anthony, Edward J.; Costa, Sandra; Hetrick, Scott              | Sustainability Science                          | 2016 | 11  | 4  | Framework |
| 42 | Peruvian anchoveta as a telecoupled fisheries system                                                                                                                                                          | Carlson, Andrew K.; Taylor, William W.; Liu, Jianguo; Orlic, Ivan                                                           | Ecology And Society                             | 2018 | 23  | 1  | Framework |
| 43 | Biodiversity conservation in a telecoupled world                                                                                                                                                              | Carrasco, L. Roman; Chan, Joleen; McGrath, Francesca L.; Nghiem, Le T. P.                                                   | Ecology And Society                             | 2017 | 22  | 3  | Framework |
| 44 | Integration across a metacoupled world                                                                                                                                                                        | Liu, Jianguo                                                                                                                | Ecology And Society                             | 2017 | 22  | 4  | Framework |
| 45 | Metacoupling supply and demand for soil conservation service                                                                                                                                                  | Zhao, Wenwu; Liu, Yue; Daryanto, Stefani; Fu, Bojie; Liu, Yanxu                                                             | Current Opinion In Environmental Sustainability | 2018 | 33  | NA | Framework |
| 46 | Measuring telecouplings in the global land system: A review and comparative evaluation of land footprint accounting methods                                                                                   | Bruckner, Martin; Fischer, Guenther; Tramberend, Sylvia; Giljum, Stefan                                                     | Ecological Economics                            | 2015 | 114 | NA | Framework |
| 47 | Analysis of energy-based metabolic efficiency and environmental pressure on the local coupling and telecoupling between urbanization and the eco-environment in the Beijing-Tianjin-Hebei urban agglomeration | Fang ChuangLin; Ren Yufei                                                                                                   | Science China-Earth Sciences                    | 2017 | 60  | 6  | Framework |
| 48 | The role of bioclimatic features, landscape configuration and historical land use in the invasion of an Asian tree in subtropical Argentina                                                                   | Montti, Lia; Piriz Carrillo, Vernica; Gutierrez-Angonese, Jorgelina; Ignacio Gasparri, N.; Aragon, Roxana; Ricardo Grau, H. | Landscape Ecology                               | 2017 | 32  | 11 | Framework |
| 49 | Trade: A Driver of Present and Future Ecosystems                                                                                                                                                              | Pace, Michael L.; Gephart, Jessica A.                                                                                       | Ecosystems                                      | 2017 | 20  | 1  | Framework |

|    |                                                                                                                                                          |                                                                                                                                                               |                                              |      |     |    |           |
|----|----------------------------------------------------------------------------------------------------------------------------------------------------------|---------------------------------------------------------------------------------------------------------------------------------------------------------------|----------------------------------------------|------|-----|----|-----------|
| 50 | Coupled human and natural systems approach to wildlife research and conservation                                                                         | Carter, Neil H.; Vina, Andres; Hull, Vanessa; McConnell, William J.; Axinn, William; Ghimire, Dirgha; Liu, Jianguo                                            | Ecology And Society                          | 2014 | 19  | 3  | Framework |
| 51 | Living With Locusts: Connecting Soil Nitrogen, Locust Outbreaks, Livelihoods, and Livestock Markets                                                      | Cease, Arianne J.; Elser, James J.; Fenichel, Eli R.; Hadrich, Joleen C.; Harrison, Jon F.; Robinson, Brian E.                                                | Bioscience                                   | 2015 | 65  | 6  | Framework |
| 52 | Telecoupling framework for research on migratory species in the Anthropocene                                                                             | Hulina, Jacqueline; Bocetti, Carol; Campa, Henry, III; Hull, Vanessa; Yang, Wu; Liu, Jianguo                                                                  | Elementa-Science Of The Anthropocene         | 2017 | 5   | NA | Framework |
| 53 | Architecture of the global land acquisition system: applying the tools of network science to identify key vulnerabilities                                | Seaquist, J. W.; Johansson, Emma Li; Nicholas, Kimberly A.                                                                                                    | Environmental Research Letters               | 2014 | 9   | 11 | Framework |
| 54 | The Telecoupling Framework: An Integrative Tool for Enhancing Fisheries Management                                                                       | Carlson, Andrew K.; Taylor, William W.; Liu, Jianguo; Orlic, Ivan                                                                                             | Fisheries                                    | 2017 | 42  | 8  | Framework |
| 55 | Energy sustainability under the framework of telecoupling                                                                                                | Fang, Baling; Tan, Yi; Li, Canbing; Cao, Yijia; Liu, Jianguo; Schweizer, Pia-Johanna; Shi, Haiqing; Zhou, Bin; Chen, Hao; Hu, Zhuangli                        | Energy                                       | 2016 | 106 | NA | Framework |
| 56 | Telecoupled land-use changes in distant countries                                                                                                        | Sun, Jing; Tong Yu-xin; Liu, Jianguo                                                                                                                          | Journal Of Integrative Agriculture           | 2017 | 16  | 2  | Framework |
| 57 | Polycentric governance in telecoupled resource systems                                                                                                   | Oberlack, Christoph; Boillat, Sébastien; Brönnimann, Stefan; Gerber, Jean-david; Heinimann, Andreas; Speranza, Chinwe Ifejika; Messerli, Peter; Rist, Stephan | Ecology And Society                          | 2018 | 23  | 1  | Framework |
| 58 | How Land Concessions Affect Places Elsewhere: Telecoupling, Political Ecology, and Large-Scale Plantations in Southern Laos and Northeastern Cambodia    | Baird, Ian G.; Fox, Jefferson                                                                                                                                 | Land                                         | 2015 | 4   | 2  | Framework |
| 59 | Land-use change in a telecoupled world: the relevance and applicability of the telecoupling framework in the case of banana plantation expansion in Laos | Friis, Cecilie; Nielsen, Jonas Ostergaard                                                                                                                     | Ecology And Society                          | 2017 | 22  | 4  | Framework |
| 60 | The Emerging Soybean Production Frontier in Southern Africa: Conservation Challenges and the Role of South-South Telecouplings                           | Ignacio Gasparri, Nestor; Kuemmerle, Tobias; Meyfroidt, Patrick; le Polain de Waroux, Yann; Kreft, Holger                                                     | Conservation Letters                         | 2016 | 9   | 1  | Framework |
| 61 | Framing ecosystem services in the telecoupled Anthropocene                                                                                               | Liu, Jianguo; Yang, Wu; Li, Shuxin                                                                                                                            | Frontiers In Ecology And The Environment     | 2016 | 14  | 1  | Framework |
| 62 | Smallholder telecoupling and potential sustainability                                                                                                    | Zimmerer, Karl S.; Lambin, Eric F.; Vanek, Steven J.                                                                                                          | Ecology And Society                          | 2018 | 23  | 1  | Framework |
| 63 | Telecoupling, urbanization, and the unintended consequences of water development aid in Ethiopia                                                         | Chignell, Stephen M; Laituri, Melinda J.                                                                                                                      | Geological Society Of America Special Papers | 2016 | 520 | NA | Framework |

|    |                                                                                                                                                                             |                                                                                                                                                                                                                                                                                                                                                                                                                           |                                            |      |    |    |           |
|----|-----------------------------------------------------------------------------------------------------------------------------------------------------------------------------|---------------------------------------------------------------------------------------------------------------------------------------------------------------------------------------------------------------------------------------------------------------------------------------------------------------------------------------------------------------------------------------------------------------------------|--------------------------------------------|------|----|----|-----------|
| 64 | Climate change, cattle, and the challenge of sustainability in a telecoupled system in Africa                                                                               | Easter, Tara S.; Killion, Alexander K.; Carter, Neil H.                                                                                                                                                                                                                                                                                                                                                                   | Ecology And Society                        | 2018 | 23 | 1  | Framework |
| 65 | The Coupling of South American Soybean and Cattle Production Frontiers: New Challenges for Conservation Policy and Land Change Science                                      | Ignacio Gasparri, Nestor; de Waroux, Yann le Polain                                                                                                                                                                                                                                                                                                                                                                       | Conservation Letters                       | 2015 | 8  | 4  | Framework |
| 66 | Applications of the Telecoupling Framework to Land-Change Science                                                                                                           | Liu, Jianguo; Hull, Vanessa; Moran, Emilio; Nagendra, Harini; Swaffield, Simon R.; Turner, B. L., II                                                                                                                                                                                                                                                                                                                      | Rethinking Global Land Use In An Urban Era | 2014 | NA | NA | Framework |
| 67 | Transforming governance in telecoupled food systems                                                                                                                         | Eakin, Hallie; Rueda, Ximena; Mahanti, Ashwina                                                                                                                                                                                                                                                                                                                                                                            | Ecology And Society                        | 2017 | 22 | 4  | Framework |
| 68 | Globalization's unexpected impact on soybean production in South America: linkages between preferences for non-genetically modified crops, eco-certifications, and land use | Garrett, Rachael D.; Rueda, Ximena; Lambin, Eric F.                                                                                                                                                                                                                                                                                                                                                                       | Environmental Research Letters             | 2013 | 8  | 4  | Framework |
| 69 | Operationalizing the telecoupling framework for migratory species using the spatial subsidies approach to examine ecosystem services provided by Mexican free-tailed bats   | Lopez-Hoffman, Laura; Diffendorfer, Jay; Wiederholt, Ruscena; Bagstad, Kenneth J.; Thogmartin, Wayne E.; McCracken, Gary; Medellin, Rodrigo L.; Russell, Amy; Semmens, Darius J.                                                                                                                                                                                                                                          | Ecology And Society                        | 2017 | 22 | 4  | Framework |
| 70 | Telecouplings in the East-West Economic Corridor within Borders and Across                                                                                                  | Leisz, Stephen J.; Rounds, Eric; Ngo The An; Nguyen Thi Bich Yen; Tran Nguyen Bang; Douangphachanh, Souvanthone; Ninchaleune, Bounheuang                                                                                                                                                                                                                                                                                  | Remote Sensing                             | 2016 | 8  | 12 | Framework |
| 71 | Framing Sustainability in a Telecoupled World                                                                                                                               | Liu, Jianguo; Hull, Vanessa; Batistella, Mateus; DeFries, Ruth; Dietz, Thomas; Fu, Feng; Hertel, Thomas W.; Izaurrealde, R. Cesar; Lambin, Eric F.; Li, Shuxin; Martinelli, Luiz A.; McConnell, William J.; Moran, Emilio F.; Naylor, Rosamond; Ouyang, Zhiyun; Polenske, Karen R.; Reenberg, Anette; Rocha, Gilberto de Miranda; Simmons, Cynthia S.; Verburg, Peter H.; Vitousek, Peter M.; Zhang, Fusuo; Zhu, Chunquan | Ecology And Society                        | 2013 | 18 | 2  | Framework |
| 72 | Impact of Inter-Basin Water Transfer Projects on Regional Ecological Security from a Telecoupling Perspective                                                               | Quan, Yuan; Wang, Chenxing; Yan, Yan; Wu, Gang; Zhang, Hongxun                                                                                                                                                                                                                                                                                                                                                            | Sustainability                             | 2016 | 8  | 2  | Framework |
| 73 | Forest Sustainability in China and Implications for a Telecoupled World                                                                                                     | Liu, Jianguo                                                                                                                                                                                                                                                                                                                                                                                                              | Asia & The Pacific Policy Studies          | 2014 | 1  | 1  | Framework |
| 74 | Assessing temporal couplings in social-ecological island systems: historical deforestation and soil loss on Mauritius (Indian Ocean)                                        | Norder, S. J.; Seijmonsbergen, A. C.; Rughooputh, Soonil D. D. V.; van Loon, E. E.; Tatayah, V.; Kamminga, A. T.; Rijdsdijk, K. F.                                                                                                                                                                                                                                                                                        | Ecology And Society                        | 2017 | 22 | 1  | Framework |

|    |                                                                                                                  |                                                                                                                                                                                                                                                                                                                                                                                                                                    |                                                                                 |      |     |      |           |
|----|------------------------------------------------------------------------------------------------------------------|------------------------------------------------------------------------------------------------------------------------------------------------------------------------------------------------------------------------------------------------------------------------------------------------------------------------------------------------------------------------------------------------------------------------------------|---------------------------------------------------------------------------------|------|-----|------|-----------|
| 75 | Ecosystem service flows from a migratory species: Spatial subsidies of the northern pintail.                     | Bagstad, Kenneth J; Semmens, Darius J; Diffendorfer, James E; Mattsson, Brady J; Dubovsky, James; Thogmartin, Wayne E; Wiederholt, Ruscena; Loomis, John; Bieri, Joanna A; Sample, Christine; Goldstein, Joshua; Lopez-Hoffman, Laura                                                                                                                                                                                              | Ambio                                                                           | 2018 | NA  | NA   | Framework |
| 76 | Measuring the potential for sustainable intensification of aquaculture in Bangladesh using life cycle assessment | Henriksson, Patrik John Gustav; Belton, Ben; Murshed-e-Jahan, Khondker; Rico, Andreu                                                                                                                                                                                                                                                                                                                                               | Proceedings Of The National Academy Of Sciences Of The United States Of America | 2018 | 115 | 12   | Framework |
| 77 | Telecoupling in urban water systems: an examination of Beijing's imported water supply                           | Deines, Jillian M.; Liu, Xiao; Liu, Jianguo                                                                                                                                                                                                                                                                                                                                                                                        | Water International                                                             | 2016 | 41  | 2    | Framework |
| 78 | Multiple telecouplings and their complex interrelationships                                                      | Liu, Jianguo; Hull, Vanessa; Luo, Junyan; Yang, Wu; Liu, Wei; Vina, Andres; Vogt, Christine; Xu, Zhenci; Yang, Hongbo; Zhang, Jindong; An, Li; Chen, Xiaodong; Li, Shuxin; Ouyang, Zhiyun; Xu, Weihua; Zhang, Hemin                                                                                                                                                                                                                | Ecology And Society                                                             | 2015 | 20  | 3    | Framework |
| 79 | Spillover systems in a telecoupled Anthropocene: Typology, methods, and governance for global sustainability     | Liu, Jianguo; Dou, Yue; Batistella, Mateus; Challies, Edward; Connor, Thomas; Friis, Cecilie; Millington, James D.A.; Parish, Esther; Romulo, Chelsie; Silva, Ramon Felipe Bicudo da; Triezenberg, Heather; Yang, Hongbo; Zhao, Zhiqiang; Zimmerer, Karl; Huettmann, Falk; Treglia, Michael L.; Basher, Zeenatul; Chung, Min Gon; Herzberger, Anna; Lenschow, Andrea; Mechiche-Alami, Altaaf; Newig, Jens; Roche, James; Sun, Jing | Current Opinion In Environmental Sustainability                                 | 2018 | 33  | NA   | Framework |
| 80 | Systems integration for global sustainability                                                                    | Liu, Jianguo; Mooney, Harold; Hull, Vanessa; Davis, Steven J.; Gaskell, Joanne; Hertel, Thomas; Lubchenco, Jane; Seto, Karen C.; Gleick, Peter; Kremen, Claire; Li, Shuxin                                                                                                                                                                                                                                                         | Science                                                                         | 2015 | 347 | 6225 | Framework |
| 81 | Integrated assessments of payments for ecosystem services programs                                               | Liu, Jianguo; Yang, Wu                                                                                                                                                                                                                                                                                                                                                                                                             | Proceedings Of The National Academy Of Sciences Of The United States Of America | 2013 | 110 | 41   | Framework |
| 82 | Uncovering the spatially distant feedback loops of global trade: A network and input-output approach             | Prell, Christina; Sun, Laixiang; Feng, Kuishuang; He, Jiaying; Hubacek, Ilaus                                                                                                                                                                                                                                                                                                                                                      | Science Of The Total Environment                                                | 2017 | 586 | NA   | Framework |

|    |                                                                                                   |                                                                                                                                                                                                                                                                   |                                                                                 |      |     |    |           |
|----|---------------------------------------------------------------------------------------------------|-------------------------------------------------------------------------------------------------------------------------------------------------------------------------------------------------------------------------------------------------------------------|---------------------------------------------------------------------------------|------|-----|----|-----------|
| 83 | Importing food damages domestic environment: Evidence from global soybean trade                   | Sun, Jing; Mooney, Harold; Wu, Wenbin; Tang, Huajun; Tong, Yuxin; Xu, Zhenci; Huang, Baorong; Cheng, Yeqing; Yang, Xinjun; Wei, Dan; Zhang, Fusuo; Liu, Jianguo                                                                                                   | Proceedings Of The National Academy Of Sciences Of The United States Of America | 2018 | 115 | 21 | Framework |
| 84 | Telecoupling Toolbox: spatially explicit tools for studying telecoupled human and natural systems | Tonini, Francesco; Liu, Jianguo                                                                                                                                                                                                                                   | Ecology And Society                                                             | 2017 | 22  | 4  | Framework |
| 85 | Trade in the telecoupling framework: Evidence from the metals industry                            | Xiong, Hang; Millington, James D A; Xu, Wei                                                                                                                                                                                                                       | Ecology And Society                                                             | 2018 | 23  | 1  | Framework |
| 86 | New road for telecoupling global prosperity and ecological sustainability                         | Yang, Dewei; Cai, Jingjing; Hull, Vanessa; Wang, Kaiyong; Tsang, Yin-Phan; Liu, Jianguo                                                                                                                                                                           | Ecosystem Health And Sustainability                                             | 2016 | 2   | 10 | Framework |
| 87 | Economic drivers of telecoupling and terrestrial carbon fluxes in the global soybean complex      | Yao, Guolin; Hertel, Thomas; Taheripour, Farzad                                                                                                                                                                                                                   | Global Environmental Change                                                     | 2018 | 50  | NA | Framework |
| 88 | Feedback of telecoupling: the case of a payments for ecosystem services program                   | Yang, Hongbo; Lupi, Frank; Zhang, Jindong; Chen, Xiaodong; Liu, Jianguo                                                                                                                                                                                           | Ecology And Society                                                             | 2018 | 23  | 2  | Framework |
| 89 | Urban water sustainability: framework and application                                             | Yang, Wu; Hyndman, David W.; Winkler, Julie A.; Vina, Andres; Deines, Jillian M.; Lupi, Frank; Luo, Lifeng; Li, Yunkai; Basso, Bruno; Zheng, Chunmiao; Ma, Dongchun; Li, Shuxin; Liu, Xiao; Zheng, Hua; Cao, Guoliang; Meng, Qingyi; Ouyang, Zhiyun; Liu, Jianguo | Ecology And Society                                                             | 2016 | 21  | 4  | Framework |
